# Supplementary material
Source: HighWire-hosted journal article supplement (https://jnm.snmjournals.org/highwire/filestream/105290/field_highwire_adjunct_files/0/262398_Supplemental_Data.pdf)
Supplement: 262398_Supplemental_Data.pdf [file 262398_Supplemental_Data.pdf]

**Supplemental Figure 1:** Receiver operating characteristic (ROC) curves for the segment-level analysis for clinically significant lesions (excluding Gleason score 3+3=6) obtained using a binary score for the PSMA PET/CT and mpMRI majority reads (left), using the 1-to-5 PSMA and PI-RADS scores for each individual reader (right).

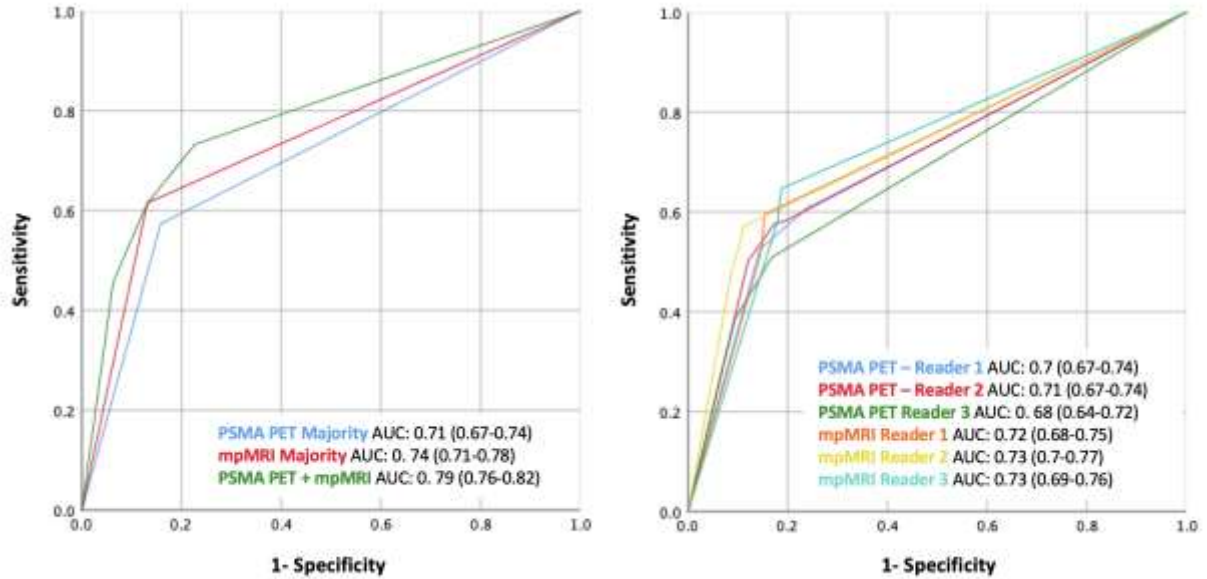

**Supplemental Figure 2:** Two case examples from our cohort.

(Top row) 61-year-old patient (#23) with biopsy-proven prostate cancer Gleason Score of 4+5=9 and PSA of 11.6 ng/ml at time of PSMA PET/CT. (A) Transverse PSMA PET/CT, (B) T2weighted MRI images show a large PSMA-avid and hypointense lesion, respectively encompassing the right-posterior/left-posterior (large yellow arrow) and right-anterior midgland (small yellow arrow). (C) high b-value diffusion-weighted (DWI) MR images show diffusion restriction in the same location. Whole mount pathology (D) shows two lesions located in the right-posterior/left-posterior midgland (Gleason Score 4+5=9 - contoured in yellow) and right-anterior midgland (Gleason Score 3+4=7 - contoured in green), respectively. This is an example of two lesions on pathology described as a single large lesion by both imaging modalities (two true positive findings – as yellow and green lesions were both described as positive for cancer by both imaging modalities).

(Bottom row) 68-year-old patient (#28) with biopsy-proven prostate cancer Gleason Score of 4+3=7 and PSA of 32.8 ng/ml at time of PSMA PET/CT. (E) Transverse PSMA PET/CT shows a lesion with intense PSMA uptake encompassing the left-anterior/left-posterior base (yellow arrow) and a smaller lesion with mild PSMA uptake located between the anterior- and posterior-right base (green arrow), T2weighted (F) and DWI MR images (G) show a hypointense lesion and diffusion restriction, respectively in the left-anterior base (yellow arrow). Whole mount pathology (H) shows two lesions respectively located in the left-anterior/left-posterior base (contoured in yellow) with Gleason Score 4+5=9, and in the right-anterior base (contoured in green) with Gleason Score 3+3=6. Despite mild PSMA uptake is visible in the right-anterior/posterior base lesion, only one of the three PSMA readers gave it a positive PSMA score and was therefore considered a false negative for both imaging modalities.

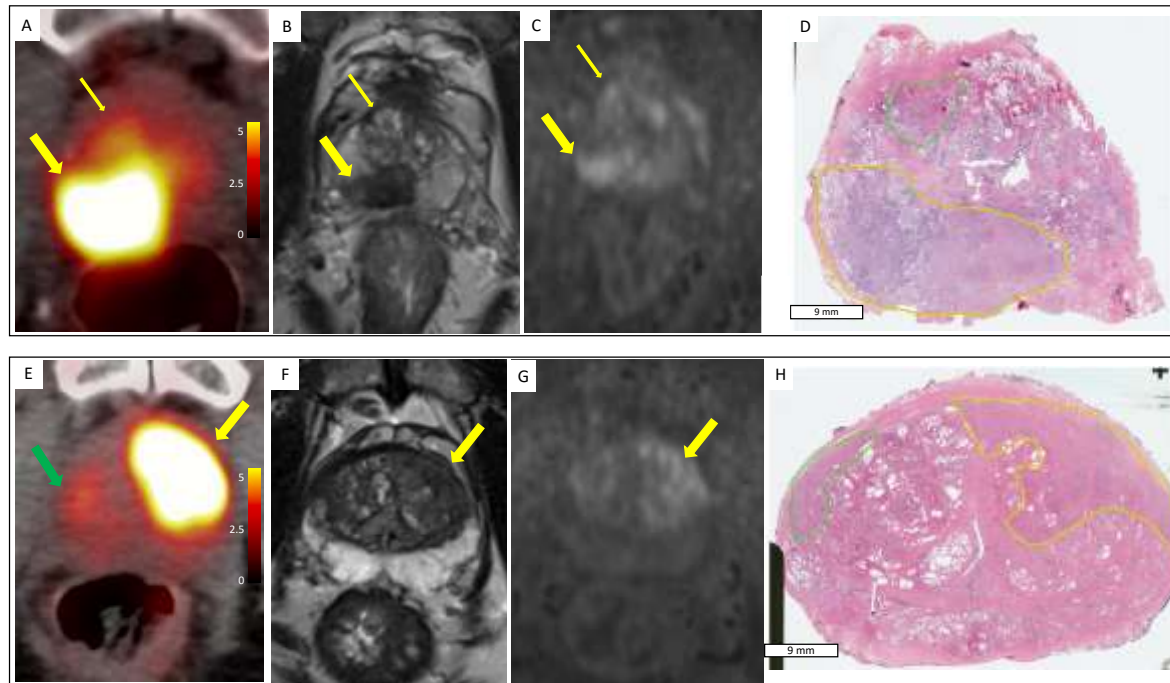

**Supplemental Table 1:** Prostate cancer detection on a lesion-level for each reader.

\* McNemar test:  $p < 0.05$

PPV= positive predictive value

|                              | PSMA PET/CT             |                         |                         | MPMRI                          |                         |                                |
|------------------------------|-------------------------|-------------------------|-------------------------|--------------------------------|-------------------------|--------------------------------|
|                              | Reader 1                | Reader 2                | Reader 3                | Reader 1                       | Reader 2                | Reader 3                       |
| <b>INDEX LESIONS</b>         | 74/74<br>(100%)         | 73/74<br>(99%)          | 73/74<br>(99%)          | 71/74<br>(96%)                 | 72/74<br>(97%)          | 71/74<br>(96%)                 |
| <b>SECONDARY LESIONS</b>     | 20/32<br>(63%)          | 17/32<br>(53%)          | 17/32<br>(53%)          | 16/32<br>(50%)                 | 19/32<br>(59%)          | 22/32<br>(69%)                 |
| <b>TERTIARY LESIONS</b>      | 0/3<br>(0%)             | 0/3<br>(0%)             | 0/3 (0%)                | 0/3<br>(0%)                    | 0/3<br>(0%)             | 0/3 (0%)                       |
| <b>OVERALL (SENSITIVITY)</b> | <b>90/109<br/>(83%)</b> | <b>94/109<br/>(86%)</b> | <b>90/109<br/>(83%)</b> | <b>87/109*</b><br><b>(80%)</b> | <b>91/109<br/>(83%)</b> | <b>94/109*</b><br><b>(86%)</b> |
| <b>PPV</b>                   | 97%                     | 94%                     | 92%                     | 98%                            | 95%                     | 99%                            |

**Supplemental Table 2:** Detailed performance of PSMA PET/CT and mpMRI in all lesions and clinically significant lesions.

| All Lesions                     | PSMA+/MRI+      | PSMA-/MRI-      | PSMA+/MRI-    | PSMA-/MRI+    | Clinically Significant Lesions  | PSMA+/MRI+      | PSMA-/MRI-    | PSMA+/MRI-    | PSMA-/MRI+    |
|---------------------------------|-----------------|-----------------|---------------|---------------|---------------------------------|-----------------|---------------|---------------|---------------|
| <b>Index lesions (n=74)</b>     | 71 (96%)        | 1 (1%)          | 1 (1%)        | 1 (1%)        | <b>Index lesions (n=74)</b>     | 71 (96%)        | 1 (1%)        | 1 (1%)        | 1 (1%)        |
| <b>Secondary lesions (n=32)</b> | 18 (56%)        | 10 (31%)        | 3 (9%)        | 1 (3%)        | <b>Secondary lesions (n=22)</b> | 17 (53%)        | 3 (9%)        | 1 (3%)        | 1 (3%)        |
| <b>Tertiary lesion (n=3)</b>    | 0 (0%)          | 3 (100%)        | 0 (0%)        | 0 (0%)        | <b>Tertiary lesion (n=1)</b>    | 0 (0%)          | 1 (100%)      | 0 (0%)        | 0 (0%)        |
| <b>Overall (n=109)</b>          | <b>89 (82%)</b> | <b>14 (13%)</b> | <b>4 (4%)</b> | <b>2 (2%)</b> | <b>Overall (n=97)</b>           | <b>88 (81%)</b> | <b>5 (5%)</b> | <b>2 (2%)</b> | <b>2 (2%)</b> |
